# Supplementary material
Source: PubMed Central journal article supplement (PMC6141175)
Supplement: jciinsight-3-122156-s209.pdf [file jciinsight-3-122156-s209.pdf]

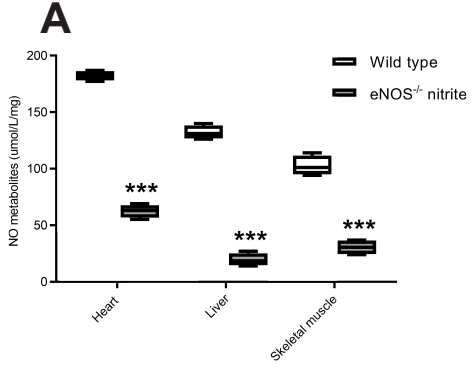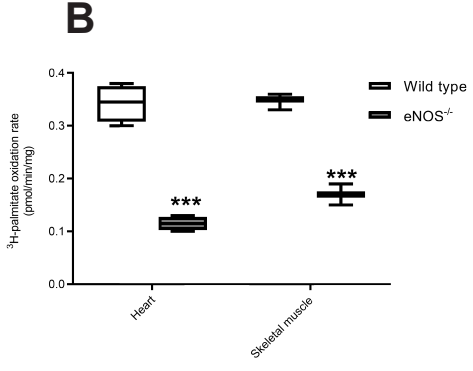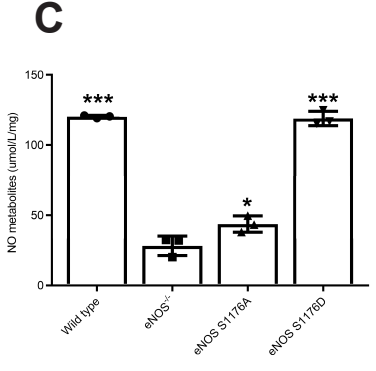

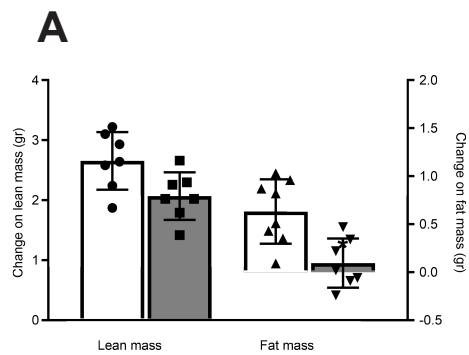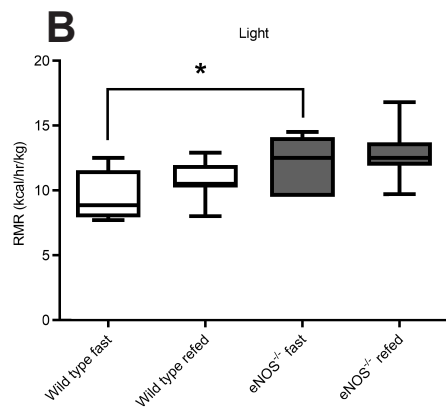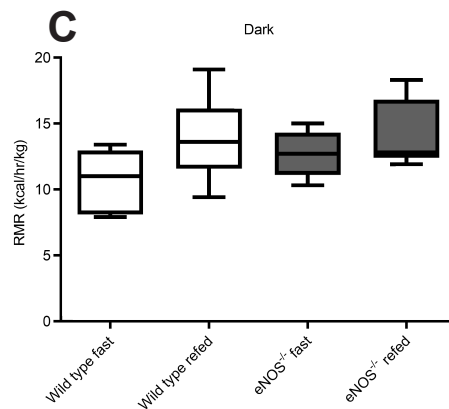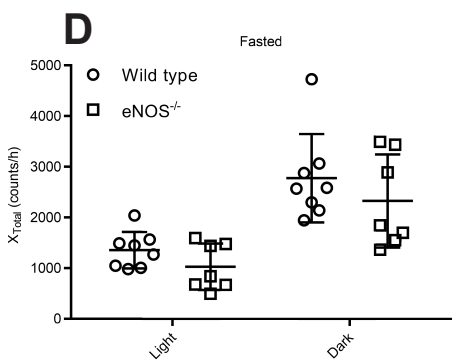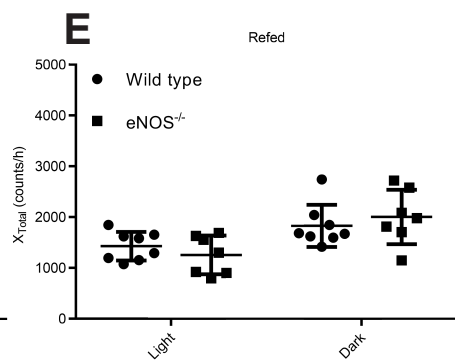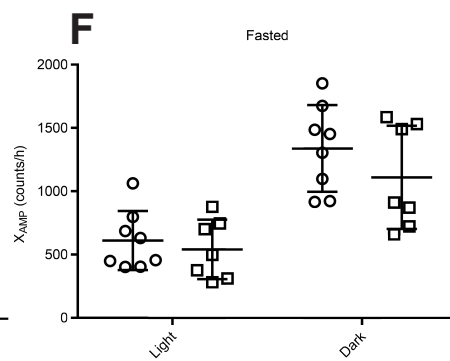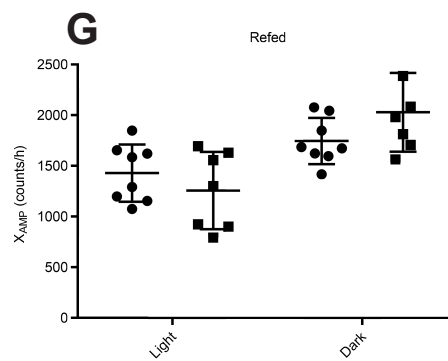

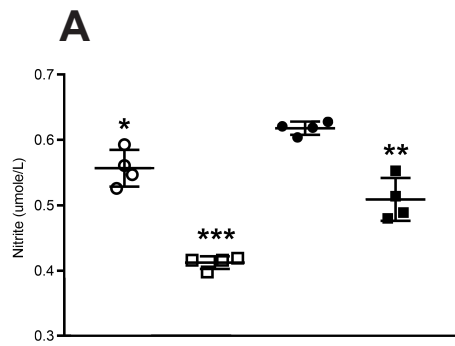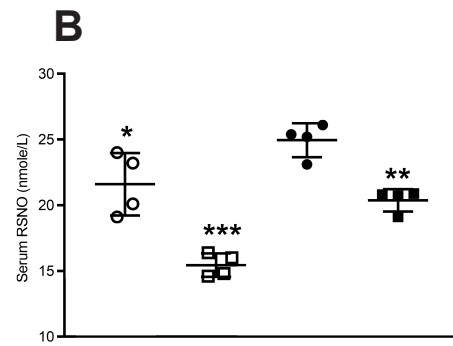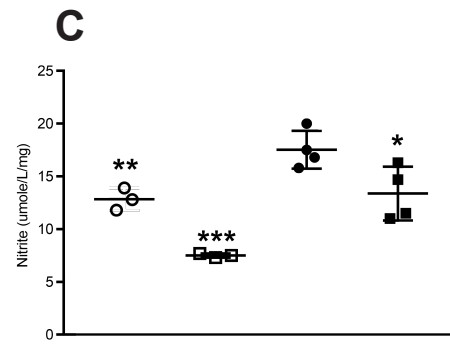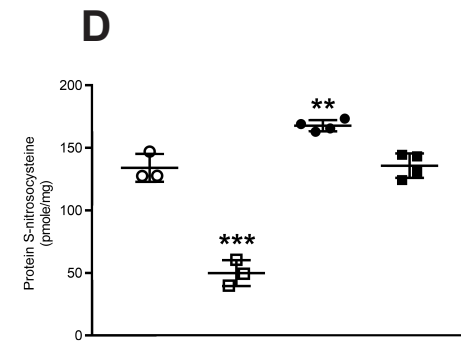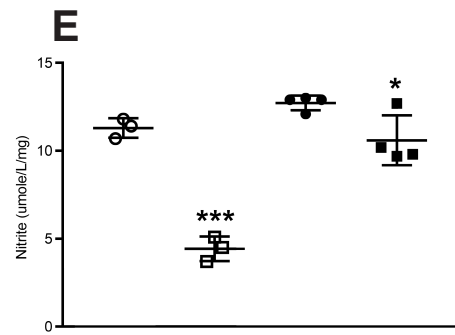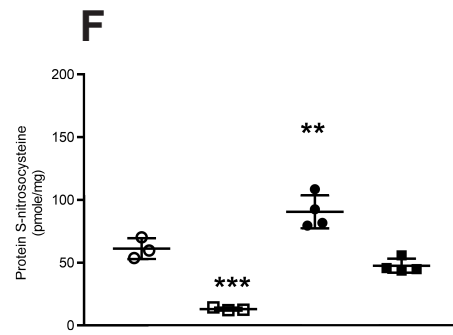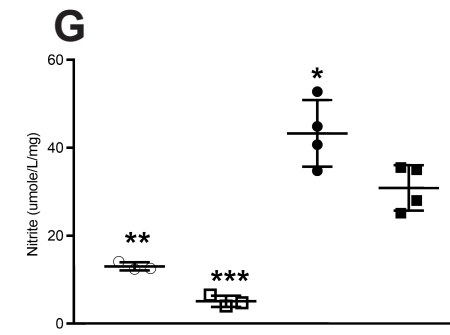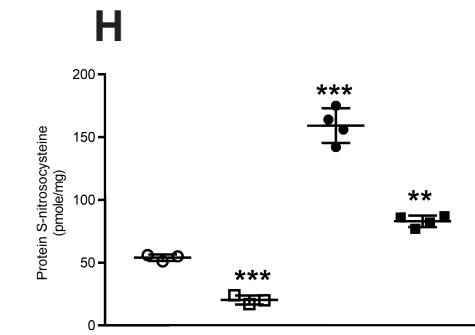

**A**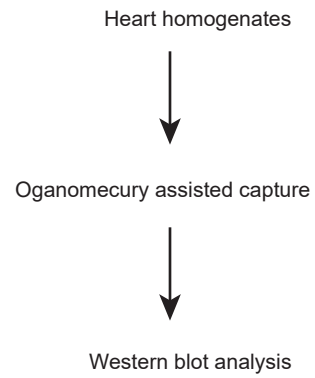

1. Unbound = unmodified
2. Bound = S-nitrosation
3. Negative control (cVLCAD<sup>-/-</sup> mice)

**B**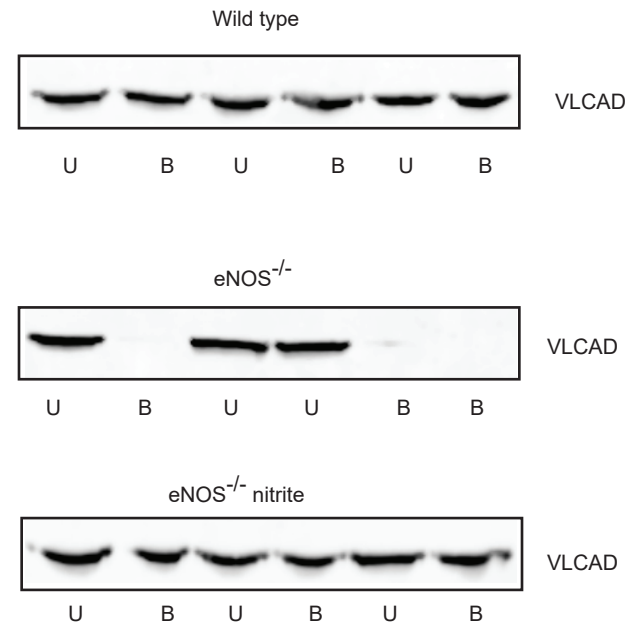

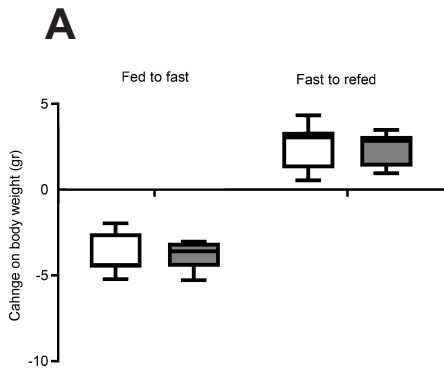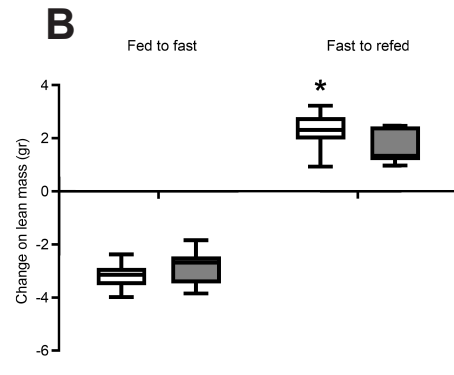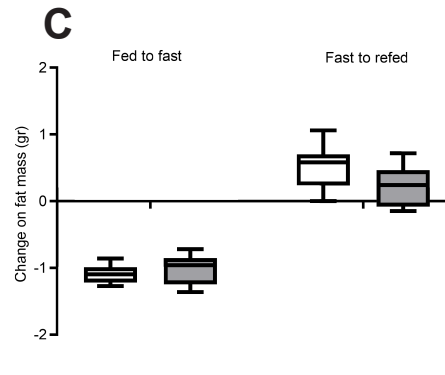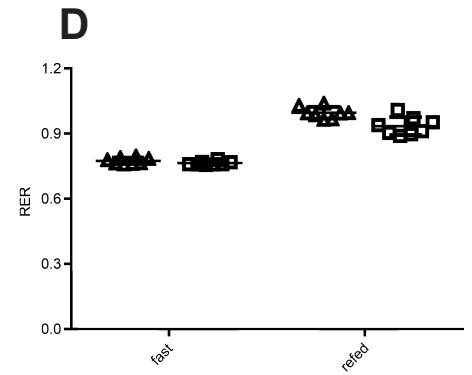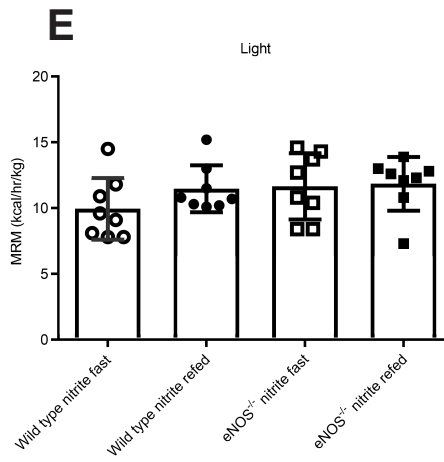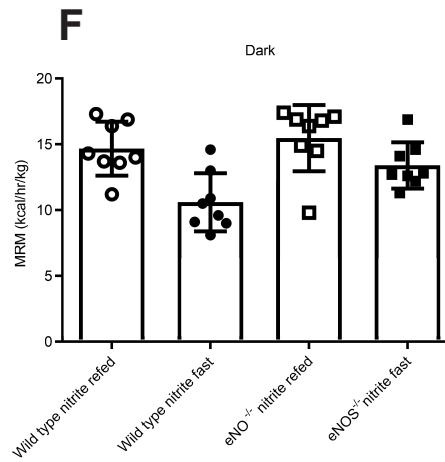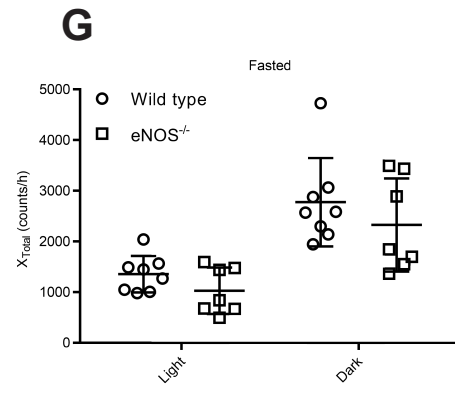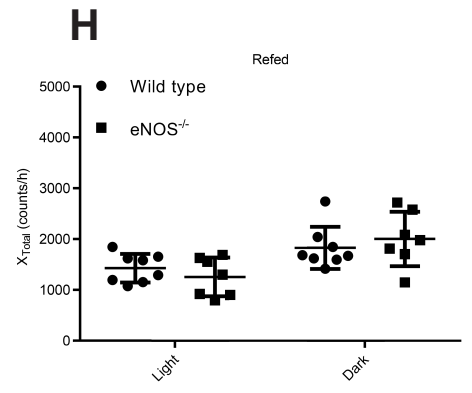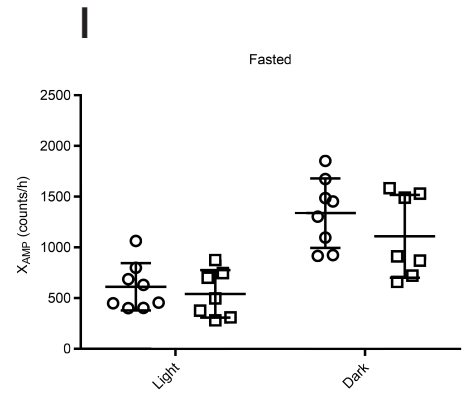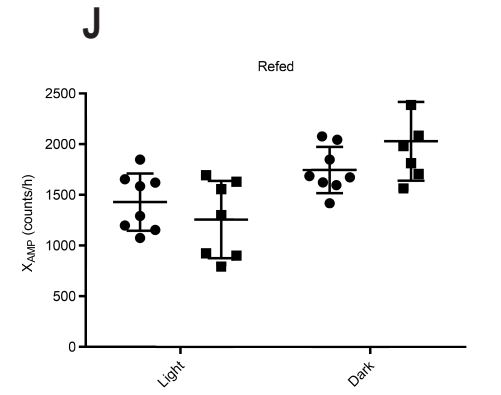

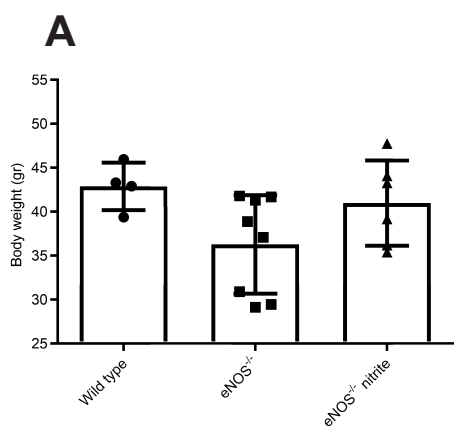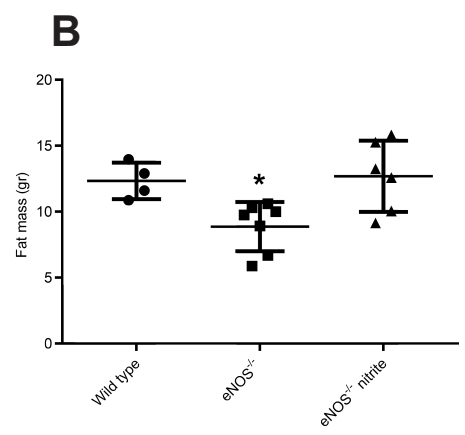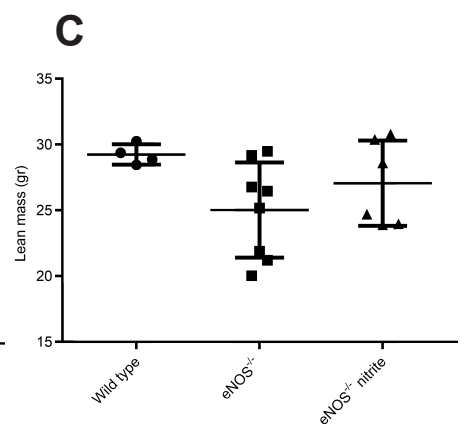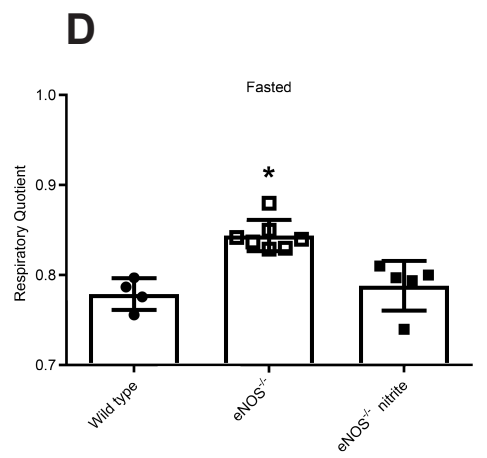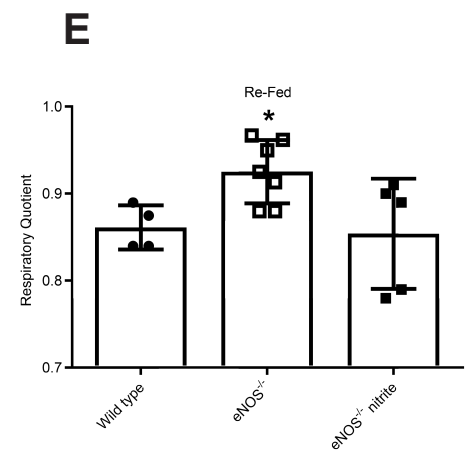

**Supplemental Table 1. Levels of liver acyl CoA species**

| <b>Metabolite (pmol/mg)</b> | <b>Wild type (N=3)</b> | <b>eNOS<sup>-/-</sup> (N=3)</b> |
|-----------------------------|------------------------|---------------------------------|
| CoA-SH                      | 87.1 ± 15.9            | 97.1 ± 14.1                     |
| Acetyl-CoA                  | 40.3 ± 5.6             | 40.3 ± 7.0                      |
| Propionyl-CoA               | 5.2 ± 1.1              | 3.5 ± 0.8                       |
| Butyryl-CoA                 | 3.6 ± 0.3              | 2.8 ± 0.4                       |
| Succinyl-CoA                | 7.4 ± 1.2              | 4.8 ± 1.1 <sup>A</sup>          |
| Acetoacetyl-CoA             | 0.3 ± 0.07             | 0.3 ± 0.04                      |
| 3-HMG-CoA                   | 0.2 ± 0.05             | 0.2 ± 0.03                      |
| 3-HO-Butyrate-CoA           | 7.1 ± 2.9              | 7.1 ± 2.4                       |
| Acetoacetyl-CoA/ acetyl-CoA | 0.008 ± 0.002          | 0.007 ± 0.0004                  |
| 3-HGM-CoA/acetyl-CoA        | 0.005 ± 0.001          | 0.005 ± 0.0004                  |

Values represent mean ± SD. Data were analyzed by 1-way ANOVA, <sup>A</sup>p < 0.05

**Supplemental Table 2. Quantification of hepatic amino acids levels**

| <b>Amino acid<br/>(nmol/mg)</b> | <b>Wild type<br/>(N=4)</b> | <b>eNOS<sup>-/-</sup><br/>(N=4)</b> |
|---------------------------------|----------------------------|-------------------------------------|
| <b>ALA</b>                      | 1.82 ± 0.72                | 1.77 ± 0.24                         |
| <b>ASN</b>                      | 0.14 ± 0.02                | 0.14 ± 0.03                         |
| <b>ASP</b>                      | 0.38 ± 0.08                | 0.43 ± 0.24                         |
| <b>CIT</b>                      | 0.04 ± 0.01                | 0.03 ± 0.01                         |
| <b>GLN</b>                      | 1.62 ± 0.12                | 1.44 ± 0.32                         |
| <b>GLU</b>                      | 0.76 ± 0.14                | 1.05 ± 0.27                         |
| <b>GLY</b>                      | 1.36 ± 0.26                | 1.32 ± 0.25                         |
| <b>ORN</b>                      | 0.27 ± 0.11                | 0.25 ± 0.05                         |
| <b>SER</b>                      | 0.19 ± 0.03                | 0.18 ± 0.06                         |
| <b>TAU</b>                      | 2.84 ± 0.22                | 2.85 ± 0.28                         |
| <b>THR</b>                      | 0.17 ± 0.03                | 0.18 ± 0.04                         |
| <b>TYR</b>                      | 0.04 ± 0.01                | 0.04 ± 0.01                         |
| <b>VAL</b>                      | 0.15 ± 0.04                | 0.18 ± 0.06                         |
| <b>HIS</b>                      | 1.45 ± 0.04                | 1.33 ± 0.12                         |
| <b>LYS</b>                      | 0.47 ± 0.13                | 0.41 ± 0.17                         |
| <b>PHE</b>                      | 0.03 ± 0.01                | 0.04 ± 0.01                         |
| <b>LEU</b>                      | 0.16 ± 0.03                | 0.18 ± 0.03                         |
| <b>TRY</b>                      | 0.02 ± 0.01                | 0.03 ± 0.01                         |
| <b>ILE</b>                      | 0.07 ± 0.02                | 0.08 ± 0.03                         |

Values represent mean ± SD.



**Supplemental Table 3. Quantification of serum acylcarnitines**

| <b>Acylcarnitine (nmol/L)</b> | <b>Wild type (N=4)</b> | <b>eNOS<sup>-/-</sup> (N=4)</b> | <b>eNOS<sup>-/+</sup> nitrite (N=4)</b> |
|-------------------------------|------------------------|---------------------------------|-----------------------------------------|
| <b>C2</b>                     | 3009± 249              | 3624 ± 805                      | 2602 ± 680                              |
| <b>C3:1</b>                   | 3.3 ± 2.5              | 2.1 ± 2.0                       | 1.5 ± 1.0                               |
| <b>C3</b>                     | 31 ± 7                 | 46 ± 19                         | 33 ± 19                                 |
| <b>C4</b>                     | 22 ± 3                 | 34 ± 9                          | 33 ± 9                                  |
| <b>C5:1</b>                   | 1.2 ± 0.01             | 1.2 ± 0.1                       | 0.5 ± 0.6                               |
| <b>C5</b>                     | 9.9 ± 2.3              | 13 ± 4                          | 8.0 ± 2.9                               |
| <b>C4-OH</b>                  | 40 ± 7                 | 57 ± 8                          | 52 ± 6                                  |
| <b>C6</b>                     | 13 ± 1                 | 17 ± 6                          | 6.8 ± 2.6                               |
| <b>C5-OH</b>                  | 7.5 ± 1.1              | 9.0 ± 1.5                       | 5.8 ± 1.2                               |
| <b>C8:1</b>                   | 1.5 ± 0.6              | 1.5 ± 0.6                       | 1.2 ± 0.5                               |
| <b>C8</b>                     | 2.4 ± 0.01             | 3.3 ± 1.1                       | 2.5 ± 0.6                               |
| <b>C3-DC</b>                  | 6.6 ± 0.7              | 8.4 ± 2.0                       | 6.2 ± 1.2                               |
| <b>C10:2</b>                  | 2.1 ± 1.1              | 1.8 ± 0.7                       | 1.5 ± 0.6                               |
| <b>C10:1</b>                  | 3.0 ± 0.7              | 4.2 ± 0.7                       | 3.0 ± 0.8                               |
| <b>C10</b>                    | 2.7 ± 0.6              | 4.2 ± 1.5                       | 4.0 ± 1.4                               |
| <b>C4-DC</b>                  | 8.1 ± 4.3              | 8.7 ± 4.0                       | 4.5 ± 1.0                               |
| <b>C5-DC</b>                  | 4.2 ± 1.5              | 4.8 ± 1.0                       | 3.8 ± 1.0                               |
| <b>C12:1</b>                  | 2.7 ± 0.6              | 4.2 ± 0.7                       | 2.5 ± 0.6                               |
| <b>C12</b>                    | 6.0 ± 1.4              | 8.7 ± 2.0                       | 5.8 ± 1.7                               |
| <b>C6-DC</b>                  | 7.8 ± 2.3              | 13 ± 5                          | 9.5 ± 2.6                               |
| <b>C14:2</b>                  | 6.3 ± 1.8              | 8.7 ± 2.0                       | 5.5 ± 1.9                               |
| <b>C14:1</b>                  | 16 ± 5                 | 28 ± 4                          | 16 ± 4                                  |
| <b>C14</b>                    | 22 ± 4                 | 33 ± 6                          | 20 ± 4                                  |
| <b>C8-DC</b>                  | 3.0 ± 0.7              | 4.2 ± 2.1                       | 2.8 ± 1.0                               |
| <b>3-OH-C12:1</b>             | 1.7 ± 0.1              | 2.4 ± 0.1                       | 2.2 ± 1.0                               |
| <b>3-OH-C12</b>               | 3.1 ± 1.4              | 6,6 ± 3.7                       | 11 ± 6                                  |
| <b>3-OH-C14:1</b>             | 3.8 ± 1.1              | 8.1 ± 1.1                       | 5.0 ± 1.4                               |
| <b>3-OH-C14</b>               | 2.7 ± 0.8              | 4.8 ± 1.7                       | 4.0 ± 1.0                               |
| <b>C16:2</b>                  | 4.0 ± 1.4              | 9.6 ± 1.0                       | 5.8 ± 1.7                               |
| <b>C16:1</b>                  | 10 ± 3                 | 26 ± 3                          | 19 ± 3                                  |
| <b>C16</b>                    | 117 ± 17               | 195 ± 50                        | 111 ± 21                                |
| <b>3-OH-C16</b>               | 3.8 ± 1.1              | 6.9 ± 1.1                       | 5.8 ± 1.2                               |
| <b>C18:2</b>                  | 17 ± 4                 | 35 ± 4                          | 20 ± 5                                  |
| <b>C18:1</b>                  | 43 ± 11                | 99 ± 13                         | 68 ± 13                                 |
| <b>C18</b>                    | 12 ± 3                 | 25± 5                           | 14 ± 4                                  |
| <b>OH-C18:2</b>               | 2.3 ± 1.0              | 4.2 ± 0.7                       | 3.0 ± 0.8                               |
| <b>OH-C18:1</b>               | 5.8 ± 2.5              | 12 ± 2                          | 7.8 ± 1.7                               |
| <b>C16-DC</b>                 | 0.8 ± 0.1              | 1.2 ± 0.1                       | 1.0 ± 0.8                               |
| <b>C18:1-DC</b>               | 0.8 ± 0.1              | 1.2 ± 0.1                       | 1 ± 0.1                                 |

Values represent mean ± SD.

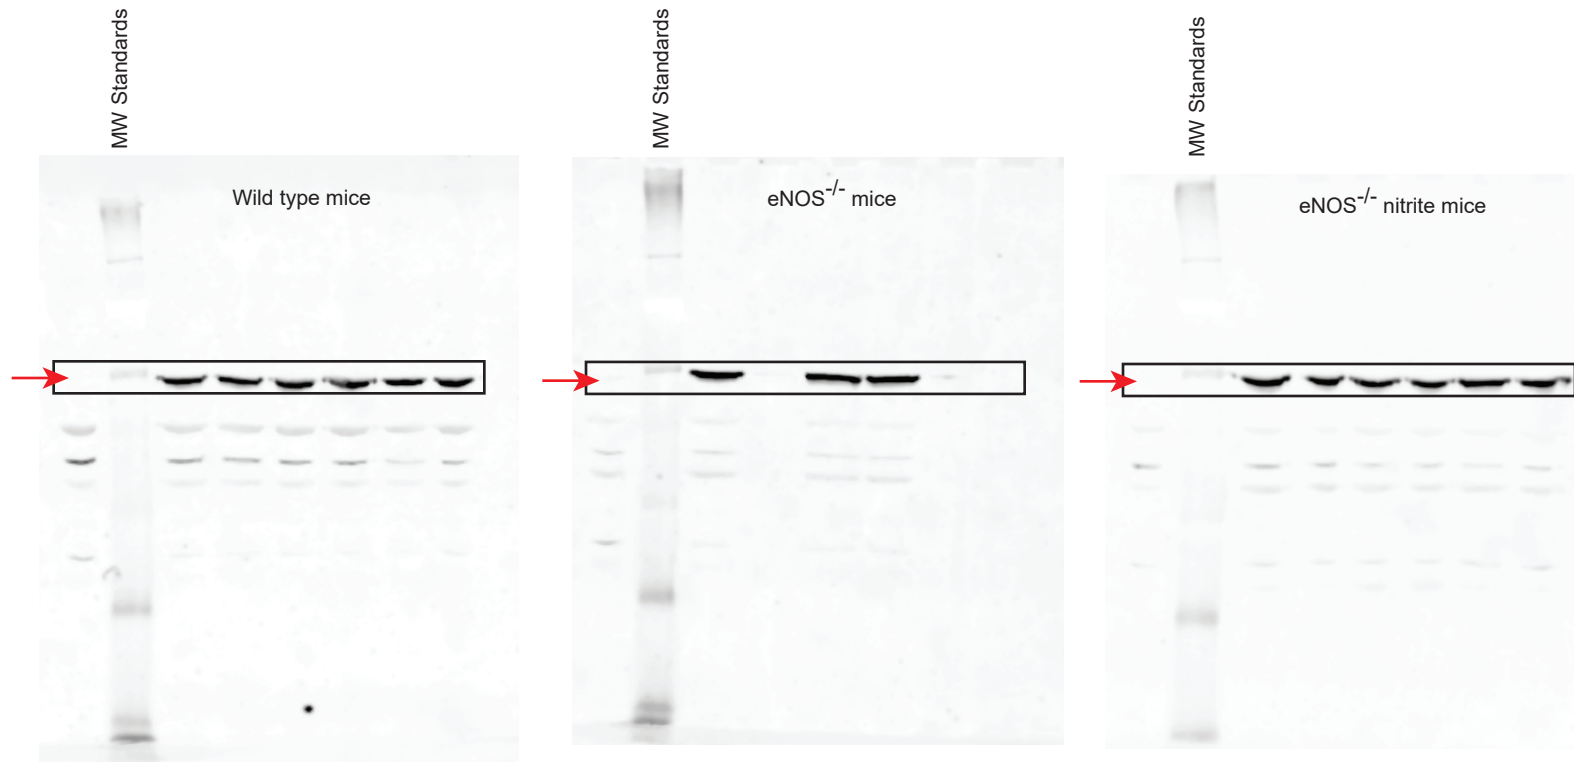

1. Three biological replicates were tested per group. Upon the collection of bound and unbound fractions the samples were concentrated and loaded on the gels.

2. The specificity of the anti-VLCAD antibody was tested in cardiac specific VLCAD<sup>-/-</sup> mice. These lanes are indicated by an arrow. The absence of immunoreactivity in these preparations documented the specificity of the antibody.
